1 *Title:* The Experience of Care Partners of Patients with Parkinsonism and Psychosis

2 *Running Title:* The Experience of Care Partners of Patients with PD Psychosis

3

4 *Authors' names and affiliations:*

5 Sneha Mantri MD MS<sup>1</sup>, Emily Klawson BS<sup>2</sup>, Steven Albert PhD<sup>2</sup>, Robyn Rapoport MA<sup>3</sup>, Chelle Precht  
6 BSBA<sup>3</sup>, Sarah Glancey BS<sup>3</sup>, Margaret Daeschler BA<sup>4</sup>, Eugenia Mamikonyan MS<sup>5</sup>, Catherine M. Kopil PhD<sup>4</sup>,  
7 Connie Marras MD PhD<sup>6</sup>, Lana M. Chahine MD<sup>7</sup>

8

9 1. Department of Neurology, Duke University, Durham NC;

10 2. Department of Behavioral and Community Health Sciences, University of Pittsburgh, Pittsburgh PA;

11 3. SSRS, Glen Mills, PA

12 4. The Michael J. Fox Foundation for Parkinson's Research, New York NY;

13 5. Department of Psychiatry, University of Pennsylvania, Philadelphia PA USA

14 6. The Edmond J Safra Program in Parkinson's disease, Toronto Western Hospital, University of Toronto,  
15 Toronto, Ontario;

16 7. Department of Neurology, University of Pittsburgh, Pittsburgh PA

17

18 *Corresponding Author:*

19 Sneha Mantri MD MS

20 932 Morreene Rd

21 DUMC 3333

22 Durham NC 27705

23 919-684-1947

24 [sneha.mantri@duke.edu](mailto:sneha.mantri@duke.edu)

25

26 *Word Count:*

27 Abstract: 210

28 Manuscript: 2981

29

30 *Key Words:* care partner; psychosis; Parkinson's disease; qualitative research

31

32 **ABSTRACT**

33

34 Background: Parkinson's disease psychosis (PDP) has a major impact on quality of life and care partner  
35 burden; however, little is known about the lived experiences of care partners in managing PDP.

36

37 Objective: To understand how care partners of individuals with PDP experience their role and articulate  
38 their needs related to psychosis.

39

40 Methods: This was a qualitative study of semi-structured telephone interviews. Recruitment was  
41 conducted online via the clinical study matching tool, Fox Trial Finder; study activities took place  
42 remotely via telephone interviews. Transcripts of the phone interviews were analyzed by grounded  
43 theory methods, and a codebook of key themes that emerged from the analysis was developed.

44

45 Results: Nine care partners (all female) were interviewed. Discussion topics in the codebook included (1)  
46 care partner burden and guilt; (2) communication with medical professionals; (3) coping strategies; (4)  
47 emotional reactions of the care partner to psychosis; (5) sources of knowledge about PD psychosis; (6)  
48 attitudes towards medications for PDP; (7) strategies to care for loved ones with psychosis; (8) psychosis  
49 triggers.

50

51 Conclusions: This qualitative analysis uncovers important aspects of the care partner experience,  
52 including challenges in navigating the medical system and communicating with professionals. Providers  
53 treating patients with PDP should be aware of these constraints and provide added support for strained  
54 care partners.

55 **INTRODUCTION**

56 Psychosis is common in advanced Parkinson's disease (PD), with a cumulative prevalence of over 80%  
57 [1]. Individuals with PD who suffer from psychosis have decreased quality of life and increased health  
58 resource utilization [2]; care partners of these individuals also have higher levels of care partner burden  
59 [3]. Additionally, care partners provide a large amount of unpaid care for loved ones with PD psychosis  
60 (PDP), leading to higher indirect costs (e.g., disability and medically-related absenteeism-related to  
61 caring for a loved one) and higher cumulative income loss over time [4]. Thus, minimizing care partner  
62 strain may have important impacts on both psychosocial and economic burden.

63  
64 Nevertheless, despite increasing recognition of and treatment strategies for PDP in recent years, little is  
65 known about the lived experience of care partners navigating this challenging phase of illness. Prior  
66 qualitative research has suggested that care partners may have difficulties communicating with medical  
67 providers about both motor and non-motor aspects of disease [5,6]; understanding these difficulties  
68 would be valuable to design strategies to improve caregiver-physician communication. In this study, we  
69 examined semi-structured interviews with care partners to discern common struggles around  
70 communication with providers, navigating available community resources, and the economic and  
71 psychosocial impact of caring for a loved one with PDP.

72

73 **MATERIALS AND METHODS**

74 The online clinical study matching tool Fox Trial Finder (FTF) (<https://foxtrialfinder.michaeljfox.org>) was  
75 used to identify care partners for participation in this study. As previously described [7], FTF is a  
76 database of PD-related research volunteers. Self-identified care partners enrolled in FTF were sent an  
77 email invitation to participate. The email invitation included a link to a survey which assessed basic  
78 eligibility criteria for inclusion in this study: English-speaking, age 18 or older, resident of the USA, and

79 access to a telephone for interview. The initial criteria included only care partners living with PD  
80 patients, but these were later modified to allow care partners not living with the patient to also  
81 participate. There were 193 respondents to the invitation, and 86 met inclusion criteria. A convenience  
82 sample of consecutive respondents was contacted for participation. Verbal informed consent was  
83 obtained over the telephone. A screening interview was then performed. Eligible subjects were  
84 administered the Symptoms for Parkinson's Disease Psychosis (SAPS-PD) scale over the telephone, with  
85 the goal of obtaining preliminary information on the burden of psychosis the recipient of care has. The  
86 SAPS-PD [8] is a 9-item scale interviewer-administered scale derived from the Scales of Assessment of  
87 Positive Symptoms (SAPS) that asks about positive symptoms of psychosis.

88  
89 The study was conducted in two phases (Figure 1). For the first phase of a study, the goal was to recruit  
90 20 care partners to participate in prompt-driven online journaling activities. The objective of this phase  
91 was to collect preliminary, pilot data to inform next phases. A convenience sample of 47 consecutive  
92 respondents were contacted until 20 had been recruited for participation in the online journaling. This  
93 consisted of a series of activities, grouped into three sessions, in which subjects responded to prompts,  
94 pictures and graphics with free-text responses. Each session was estimated to take 30 minutes.  
95 Participants were asked to complete one session a day over three days but had up to one week to  
96 complete all the sections. Responses were informally analyzed by the study team to assess components  
97 of psychosis most important to care partners and to inform development of a semi-structured  
98 discussion guide to be used during subsequent telephone interviews.

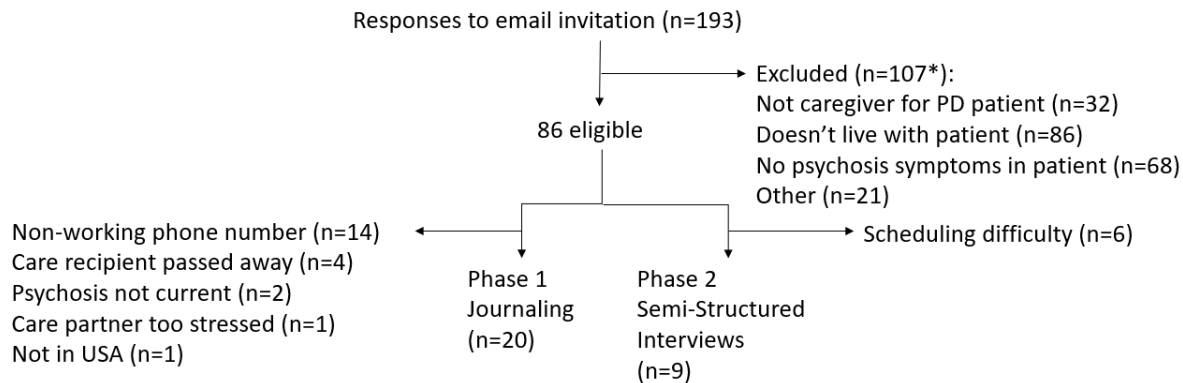

99 Figure 1. Flow Chart of Participation

100 Following this, a sample of additional care partners was recruited to participate in telephone interviews.

101 This sample was also drawn from respondents to the invitation on FTF. A discussion guide for a one-hour

102 semi-structured telephone interview was developed. Interview topics, drafted based on the results of

103 online journaling as well as expert opinion of neurologists with subspecialty expertise in movement

104 disorders (authors SM, CM, LMC). Foci of discussion included duration and evolution of care needs,

105 communication strategies with health care providers, and coping mechanisms employed by the care

106 partners. Care partners were also asked to provide descriptions of psychotic episodes, including triggers

107 and responses. The discussion guide was administered by a consultant trained in qualitative research

108 methods (author CP).

109

110 Qualitative analysis of interview transcripts was performed by researchers trained in qualitative

111 research methods (authors SM, SA, EK). NVivo 12 Pro was used to develop a codebook of common

112 themes. Themes were refined by repeated, iterative discussion between researchers [9] until a single

113 standardized codebook was developed. Based on the structure of the discussion guide, themes were

114 organized into three major domains of (A) describing psychosis; (B) care partners' physical and

115 emotional well-being; and (C) interfacing with the health care system.

116

117 This study was performed in accordance with the Declaration of Helsinki. This study is approved by the  
 118 New England Institutional Review Board, and informed consent is obtained from each participant at  
 119 enrollment.

120

121 **RESULTS**

122 The target sample at onset of recruitment was 15 individuals. However, due to challenges in  
 123 recruitment, largely related to scheduling difficulties of participants within the pre-specified time frame  
 124 for data collection, eventually, 9 telephone interviews were conducted. Participant characteristics and  
 125 burden of psychosis in the care recipients are shown in Table 1. Mean age of care partners was 61.4  
 126 years (standard deviation 8.6 years), all female. Seven were spouses of the care recipient, 1 was a  
 127 sibling, and 1 a child. Duration of parkinsonism in the care recipient ranged from 0.5-18.5 years.

128 Table 1. Demographic characteristics of Telephone Interview Participants.

| Care partner Characteristics |     |                            | Person with PDP Characteristics |                         |                   |                                   |                       |                                          |                       |                       |                        |                                     |
|------------------------------|-----|----------------------------|---------------------------------|-------------------------|-------------------|-----------------------------------|-----------------------|------------------------------------------|-----------------------|-----------------------|------------------------|-------------------------------------|
| ID                           | Age | Relation to care recipient | PD Duration (years)             | Auditory Hallucinations | Voices Conversing | Somatic or tactile hallucinations | Visual hallucinations | Global rating severity of hallucinations | Persecutory delusions | Delusions of jealousy | Delusions of reference | Global rating severity of delusions |
| 1                            | 72  | Spouse                     | 8                               | 0                       | 0                 | 0                                 | 2                     | 2                                        | 0                     | 0                     | 0                      | 0                                   |
| 2                            | 63  | Spouse                     | 5                               | 0                       | 0                 | 2                                 | 4                     | 2                                        | 0                     | 0                     | 0                      | 0                                   |
| 3                            | 70  | Spouse                     | 12                              | 0                       | 0                 | 4                                 | 0                     | 3                                        | 5                     | 3                     | 0                      | 2                                   |
| 4                            | 60  | Spouse                     | 8                               | 0                       | 0                 | 0                                 | 3                     | 3                                        | 0                     | 0                     | 2                      | 2                                   |
| 5                            | 54  | Sibling                    | 0.5                             | 2                       | 0                 | 2                                 | 2                     | 2                                        | 3                     | 3                     | 0                      | 3                                   |
| 6                            | 65  | Child                      | 18.5                            | 0                       | 0                 | 0                                 | 3                     | 2                                        | 0                     | 0                     | 0                      | 0                                   |
| 7                            | 53  | Spouse                     | 12                              | 0                       | 0                 | 2                                 | 2                     | 2                                        | 0                     | 2                     | 2                      | 2                                   |
| 8                            | 69  | Spouse                     | 17                              | 2                       | 0                 | 2                                 | 2                     | 2                                        | 2                     | 0                     | 0                      | 2                                   |
| 9                            | 47  | Spouse                     | 7                               | 0                       | 0                 | 2                                 | 2                     | 3                                        | 0                     | 0                     | 2                      | 2                                   |

129 Care partner-reported psychosis symptoms in the care recipients, as ascertained with the Symptoms for

130 Parkinson's Disease Psychosis (SAPS-PD) are also shown. SAPS-PD 0-5: 0=None; 1=Questionable; 2=Mild

131 3=Moderate; 4=Marked; 5=Severe

132

133 A detailed codebook can be found in the online Supplement. Topics of discussion included (1) care  
134 partner burden and guilt; (2) communication with medical professionals; (3) coping strategies; (4)  
135 emotional reactions of the care partner to psychosis; (5) sources of knowledge about PD psychosis; (6)  
136 attitudes towards medications for PD psychosis; (7) strategies to care for loved ones with psychosis; (8)  
137 psychosis triggers. In reviewing these topics of discussion, we arrived at three overarching domains of  
138 (A) description and characteristics of psychosis; (B) the impact of psychosis on care partners; (C)  
139 challenges faced by care partners in navigating the medical system and advocating for their loved one.

140

141 A. Description and characteristics of psychosis

142 Many care partners were able to identify clear triggers for the care-recipient's psychosis. Common  
143 triggers included environmental cues, time of day (e.g. "A lot of times he'll be a lot worse in the  
144 evenings") and wearing off of medications (e.g. "He has his off periods. You know what off periods are.  
145 It's definitely worse when he is in those, with everything. With paranoia, yes. With everything, when he  
146 has an off period. It's all worse with that.") Some episodes seemed to have multiple triggers; one care  
147 partner provided a detailed description of a chaotic series of episodes she believed to be triggered by a  
148 combination of medication changes, medical intervention, and a new living situation:

149

150 *"His, and this is what I think triggered this because he's really been pretty good, his neurologist,*  
151 *movement disorder specialist decided to wean him off of quetiapine, Seroquel because he has a slow*  
152 *heart rate and he had been collapsing some. She felt that he should be weaned off of that medication*  
153 *because his EKG showed that his heart rate was slow. What happened, I did it exactly. We went through*  
154 *several weeks and as soon as we got down to 12 and a half milligrams, had that for two days. I'm going*

155 *to describe it as, shut down. Luckily I have a friend who's a retired nurse, and she said, he has shut down.*  
156 *I called his primary and they said take him to the ER. The second day, which was the first full day he was*  
157 *in the ER, again I know what triggered it. They were doing an ultrasound to see if his carotid artery were*  
158 *plugged, they were doing all these, trying to figure out what was happening and he for whatever reason,*  
159 *went into a full-blown psychotic, wild, at least verbally, violent episode, which he had done in the*  
160 *Galapagos. The attending physician came, obviously, they called him, and he said he needs that*  
161 *quetiapine, and I said give it to him. He was better in the hospital then. They kept him awake. Then a*  
162 *week ago yesterday, Monday, he went to the skilled nursing facility and he was doing pretty well. I mean*  
163 *I was with him, he was tired, and of course, many people in the skilled nursing facility are elderly and*  
164 *hard of hearing. The CNA came in, happened to be a man, deep voice, loud voice and it triggered a*  
165 *psychotic. Again the similar kind of episode that it's hard to describe. He rambles, there are terrorists,*  
166 *he's all over the place but he's a very mild-mannered person but he's wild anyway. I asked the CNA to*  
167 *leave, I said I will deal with this, and I did." (Care partner 3, care partner for 12 years, SAPS-PD of care*  
168 *recipient 17).*

169

170 B. The impact of psychosis on care partners.

171 Most of the care partners reported providing a significant amount of unpaid care, from managing  
172 medications to attending doctors' appointments, which prevented them from pursuing other

173 commitments. One care partner stated "I did give up positions on two boards because I felt the stress of  
174 being overcommitted. Whereas, before in my life, I could do multiple things and balance them all."

175 Another denoted her caregiving responsibilities in explicitly work-based terms: "18.5 hour shifts straight  
176 multiple times a week." For the majority of respondents (8 of 9), the subject was the sole care partner  
177 for the patient; the 9th care partner, a daughter, shared caregiving responsibility with her sisters, but  
178 with significant disruption to her own life: "I drop[ped] out of school and ... come here for three weeks



179 out of each month then new people can take the other week, so I can go home....This will be my eighth  
180 summer.” Care partners did not distinguish between the impact of providing psychosis-related care and  
181 the impact of providing care in general.

182  
183 Care partners reported a variety of negative emotions around their caregiving responsibilities and  
184 changed relationships. One stated “after it’s gone on maybe an hour, I’m tired and I lose my temper and  
185 I go through, in more of a parental voice.” Another acknowledged that she was “in total denial,” and a  
186 third reported suicidal ideation, including “two or three occasions when I had to stop myself from  
187 pulling in front of” oncoming traffic. This care partner reported that she was hesitant to report these  
188 feelings because of fear that “the bad agency people [would] use that against me.” Other care partners,  
189 however, did acknowledge benefit from speaking with support groups, therapists, social workers, or  
190 physicians. Other important coping strategies included mindfulness meditation or other solitary  
191 activities such as listening to podcasts and reading books.

192  
193 C. Navigating the medical system and advocating for the PD care recipient

194 All care partners reported significant challenges navigating the medical system. Seven of nine care  
195 partners reported that the neurologist or movement disorders specialist managing Parkinson’s  
196 symptoms did not routinely ask about psychosis. Of the two who did obtain information about psychosis  
197 from a physician, both described being asked “a list of questions” or “he just ran down the examples. He  
198 didn’t really go into it too much.” Alternate sources of knowledge about psychosis included informal  
199 networks (e.g. “I talked to a friend about it and her mother had Parkinson’s”), support groups and  
200 workshops by national organizations, and television commercials or “doctor Google.” Care partners also  
201 expressed concern about wanting to shield the care recipient or themselves from embarrassment by

202 openly discussing psychosis in the clinical visit, instead resorting to sending email or electronic medical  
203 record portal messages, phone calls, or passing notes through nurses or receptionists.

204  
205 Care partners expressed ambivalence regarding the use of medications to treat PD psychosis. Concerns  
206 included fear of medication interactions: “It all depends on the side effects and whether they all play  
207 well together.... We’re walking a real fine line with the way all these are balanced together.” All care  
208 partners felt that the threshold to start medications for psychosis depended on when a patient was felt  
209 to be a danger to themselves or others. Of the three care partners whose PD partners had started  
210 antipsychotic medications, all were on quetiapine. Care partners reported feeling satisfied with  
211 responsiveness of psychosis to this medication; one likened an attempted taper (quoted above) as akin  
212 to breaking an addiction.

213

## 214 **DISCUSSION**

215 This qualitative analysis of the experience of care partners of people with PD psychosis uncovers  
216 important dimensions of caring for an individual with an advanced neurodegenerative condition.  
217 Triggers of psychosis identified by care partners were consistent with triggers taught to medical  
218 professionals [2], including changes in environment or routine, sundowning, and the impact of  
219 medications on psychotic symptoms. Importantly, care partners reported relying on informal networks  
220 for knowledge and anticipatory guidance, and those who did discuss psychosis with their partner’s  
221 physician rarely did so in the presence of the patient. Additionally, the impact of psychosis on care  
222 partners’ emotional state should not be dismissed. All care partners experienced significant disruption  
223 to their own lives in caring for their partner, several reported feelings of isolation and depression, and  
224 one revealed thoughts of suicide. All commented on the importance of anticipatory guidance from the  
225 medical care team as their care recipient’s disease progressed. Surprisingly, the majority of care

226 partners reported that they were never routinely asked about psychosis by their care recipient's  
227 neurologist, despite the fact that psychiatric symptom assessment (including psychosis) is considered  
228 standard of care for people with PD [10]. This underscores an important practice gap that warrants  
229 further attention.

230

231 While care partner burden and care partner burnout is increasingly recognized to contribute to poor  
232 outcomes in PD [3,11,12], a qualitative interview captures the severity of care partner burden in a much  
233 richer way than a Likert-scale questionnaire. For instance, the extended quotation from care partner 3's  
234 interview mirrors what Arthur Frank, a medical sociologist, terms the chaos narrative [13]. In the chaos  
235 narrative, the storyteller (here, the care partner) struggles to provide a coherent, linear plot; rhetorical  
236 structures may be repeated, settings may shift abruptly, and time may shrink or dilate without warning.  
237 This style produces in the reader a sensation of anxiety, akin to that felt by the care partner during the  
238 psychotic episode itself. Several of the care partners interviewed emphasized the need for routine and  
239 structure in mitigating psychosis symptoms. However, the chaotic lack of structure caused by psychosis,  
240 particularly psychosis without an apparent trigger, led to deep emotional distress among care partners,  
241 including reports of suicidal ideation. Understanding the dynamics of the chaos narrative may help  
242 clinicians comprehend the struggles of care partners at this challenging stage of the disease.

243

244 To our knowledge, this is the first such report of qualitative interviews of care partners dealing with PDP.  
245 The themes uncovered by our analysis are consistent with other qualitative analyses of PD care partner  
246 experience [14–16] and the experience of care partners of those with other causes of psychosis [17],  
247 including the challenges of self-care while caregiving and the need for better care partner support.

248

249 Noted strengths of the current study are detailed verbatim transcripts by highly articulate care partners,  
250 which allowed for development of a nuanced codebook. Nevertheless, some important caveats should  
251 be kept in mind. As with all qualitative studies, the number of interviews was relatively small, favoring  
252 depth of analysis over breadth. All the care partners were female and highly educated; their experiences  
253 may not necessarily reflect the challenges faced by care partners of other sociodemographic groups. In  
254 particular, quantitative data suggests that male and female care partners experience their role  
255 differently [18]; we were unable to verify this in our interviews as only female care partners volunteered  
256 to be interviewed.

257 Further, we did not have access to medical records to verify diagnoses, disease durations, or  
258 psychosis duration reported by care partners. One care partner reported that her care recipient had  
259 been diagnosed with PD just 6 months before; early development of psychosis in this individual might  
260 suggest an alternate diagnosis, such as dementia with Lewy bodies, and the different prognosis of this  
261 disease may warrant more intensive support than typical for idiopathic PD. Additionally, there was wide  
262 variation in duration of caregiving (range 6 months to 18.5 years), and care partner experience may vary  
263 according to how long they have been involved with their care recipient; this could be an interesting  
264 area of future study. Nevertheless, core themes such as the need for better care partner education and  
265 anticipatory guidance from physicians, are likely readily translatable to a variety of settings and can  
266 serve as a needs-assessment for the development of educational materials for patients and care  
267 partners around PDP.

268

## 269 **ACKNOWLEDGEMENTS**

270 We would like to thank volunteers on The Michael J. Fox Foundation's Fox Trial Finder, an online clinical  
271 trial matching tool for Parkinson's research ([www.michaeljfox.org/trial-finder](http://www.michaeljfox.org/trial-finder)).

272

273 **CONFLICTS OF INTEREST**

274 The Michael J Fox Foundation (MJFF), which sponsored this study, is funded by ACADIA  
275 Pharmaceuticals, Adamas Pharmaceuticals, Intec Pharma, Lundbeck Inc., and Sunovion Pharmaceutical.  
276 Author SM receives research support from MJFF, from the Parkinson Foundation (PF), and from Cerevel  
277 Therapeutics, was a paid consultant to MJFF, is a study site investigator for a study sponsored by  
278 Neuraly Rho, is a study site sub-investigator for a study sponsored by Biogen, and received consulting  
279 fees from Deep Brain Innovations, LLC. Author CM receives research support from MJFF, from the  
280 Canadian Institutes of Health Research, from PF, and from the International Parkinsons and Movement  
281 Disorder Society, and is a site investigator for a research study supported by Theravance Biopharma.  
282 Author LMC receives research support from MJFF, receives research support from the UPMC  
283 Competitive Medical Research Fund, is study site investigator for a study sponsored by Biogen, receives  
284 research support from the National Institutes of Health, receives royalties from Elsevier (for  
285 authorship), and receives royalties from Wolters Kluwel (for authorship). This does not alter our  
286 adherence to PLOS ONE policies on sharing data and materials. There are no patents, products in  
287 development or marketed products associated with this research to declare.

288 **AUTHOR CONTRIBUTIONS**

289 Conceptualization: CM, LC  
290 Data Curation: EK, SA, EM  
291 Formal Analysis: SM, EK, SA  
292 Funding Acquisition: LC  
293 Investigation: CP  
294 Methodology: SM, LC  
295 Project Administration: RR, CP, SG  
296 Resources: MD, CK

297 Software: SM, EK

298 Supervision: CM, LC

299 Validation: SM, EK, SA

300 Visualization: SM, EK, SA

301 Writing Original Draft: SM

302 Writing/Review and Editing: EK, SA, RR, CP, SG, MD, EM, CK, CM, LC

303 **REFERENCES**

- 304 1. Gibson G, Mottram PG, Burn DJ, Hindle JV, Landau S, Samuel M, et al. Frequency, prevalence,  
305 incidence and risk factors associated with visual hallucinations in a sample of patients with Parkinson's  
306 disease: a longitudinal 4-year study. *Int J Geriatr Psychiatry*. 2013;28:626–31.
- 307 2. Fredericks D, Norton JC, Atchison C, Schoenhaus R, Pill MW. Parkinson's disease and Parkinson's  
308 disease psychosis: a perspective on the challenges, treatments, and economic burden. *Am J Manag Care*.  
309 2017;23:S83–92.
- 310 3. Martinez-Martin P, Rodriguez-Blazquez C, Forjaz MJ, Frades-Payo B, Agüera-Ortiz L, Weintraub D, et  
311 al. Neuropsychiatric symptoms and caregiver's burden in Parkinson's disease. *Parkinsonism Relat Disord*.  
312 2015;21:629–34.
- 313 4. Martinez-Martin P, Macaulay D, Jalundhwala YJ, Mu F, Ohashi E, Marshall T, et al. The long-term  
314 direct and indirect economic burden among Parkinson's disease caregivers in the United States. *Mov  
315 Disord Off J Mov Disord Soc*. 2019;34:236–45.
- 316 5. Armstrong MJ, Rastgardani T, Gagliardi AR, Marras C. Barriers and facilitators of communication about  
317 off periods in Parkinson's disease: Qualitative analysis of patient, carepartner, and physician Interviews.  
318 *PloS One*. 2019;14:e0215384.
- 319 6. Boersma I, Jones J, Coughlan C, Carter J, Bekelman D, Miyasaki J, et al. Palliative Care and Parkinson's  
320 Disease: Caregiver Perspectives. *J Palliat Med*. 2017;20:930–8.
- 321 7. Rocker C, Cappelletti L, Marshall C, Meunier CC, Brooks DW, Sherer T, et al. Use of an online portal to  
322 facilitate clinical trial recruitment: a preliminary analysis of Fox Trial Finder. *J Park Dis*. 2015;5:55–66.
- 323 8. Voss T, Bahr D, Cummings J, Mills R, Ravina B, Williams H. Performance of a shortened Scale for  
324 Assessment of Positive Symptoms for Parkinson's disease psychosis. *Parkinsonism Relat Disord*.  
325 2013;19:295–9.
- 326 9. Starks H, Trinidad SB. Choose your method: a comparison of phenomenology, discourse analysis, and  
327 grounded theory. *Qual Health Res*. 2007;17:1372–80.
- 328 10. Factor SA, Bennett A, Hohler AD, Wang D, Miyasaki JM. Quality improvement in neurology:  
329 Parkinson disease update quality measurement set Executive summary. *Neurology*. 2016;86:2278–83.
- 330 11. Grün D, Pieri V, Vaillant M, Diederich NJ. Contributory Factors to Caregiver Burden in Parkinson  
331 Disease. *J Am Med Dir Assoc*. 2016;17:626–32.
- 332 12. Mosley PE, Moodie R, Dissanayaka N. Caregiver Burden in Parkinson Disease: A Critical Review of  
333 Recent Literature. *J Geriatr Psychiatry Neurol*. 2017;30:235–52.
- 334 13. Frank AW. *The wounded storyteller: body, illness, and ethics* [Internet]. Second edition. Chicago: The  
335 University of Chicago Press, 2013.; 2013. Available from:  
336 <https://find.library.duke.edu/catalog/UNCb7633261>

- 337 14. Tan SB, Williams AF, Morris ME. Experiences of caregivers of people with Parkinson’s disease in  
338 Singapore: a qualitative analysis. *J Clin Nurs*. 2012;21:2235–46.
- 339 15. Berger S, Chen T, Eldridge J, Thomas CA, Habermann B, Tickle-Degnen L. The self-management  
340 balancing act of spousal care partners in the case of Parkinson’s disease. *Disabil Rehabil*. 2019;41:887–  
341 95.
- 342 16. Lennaerts-Kats H, Ebenau A, Steppe M, van der Steen JT, Meinders MJ, Vissers K, et al. “How Long  
343 Can I Carry On?” The Need for Palliative Care in Parkinson’s Disease: A Qualitative Study from the  
344 Perspective of Bereaved Family Caregivers. *J Park Dis*. IOS Press; 2020;Preprint:1–12.
- 345 17. Poon AWC, Joubert L, Harvey C. Perceived needs of carers of people with psychosis: An Australian  
346 longitudinal population-based study of caregivers of people with psychotic disorders. *Health Soc Care*  
347 *Community*. 2018;26:412–22.
- 348 18. Balash Y, Korczyn AD, Migirov AA, Gurevich T. Quality of life in Parkinson’s disease: A gender-specific  
349 perspective. *Acta Neurol Scand*. 2019;140:17–22.
- 350



## **SUPPORTING INFORMATION**

### **S1. Table. Codebook of Discussion Topics, Sub-codes, Definitions, and Representative Quotations.**

Codes were defined by grounded theory methods and refined through iterative discussion among the research team.
